# Supplementary material for: RNA Sequencing and Co-expressed Long Non-coding RNA in Modern and Wild Wheats
Source: PubMed Central journal article supplement (PMC5587677; doi:10.1038/s41598-017-11170-8), 2017-09-06
Supplement: 41598_2017_11170_MOESM1_ESM.pdf [file 41598_2017_11170_MOESM1_ESM.pdf]

# RNA SEQUENCING and CO-EXPRESSED LONG NON-CODING RNA IN MODERN AND WILD WHEATS

Halise Busra Cagirici<sup>1</sup>, Burcu Alptekin<sup>2</sup> and Hikmet Budak<sup>1,2</sup>

## Supplementary Information

- Supplementary Figure 1.** *The distribution of percent change of the number of transcripts over a set of FPKM cutoffs.* Plot of percent change over 0 to 2 FPKM cutoffs (A). Closer look at the graph between the cutoffs of 0 to 1 (B).
- Supplementary Figure 2.** *Homology pattern between T. turgidum proteins and other plants.* (A) The pie chart shows the distribution of top-ten plants which showed the highest homology to *T. turgidum* proteins. (B) Pie chart shows the distribution of e-values for different blast hits.
- Supplementary Figure 3.** *Length distribution of lncRNAs and coding transcripts from each T. turgidum variety.* (Explanation for graph legend: Kiz-lnc: lncRNAs from variety Kiziltan, TR-lnc: lncRNAs from variety TR39477, TTD-lnc: lncRNAs from variety TTD-22, Kiz-cod: coding transcripts from variety Kiziltan, TR-cod: coding transcripts from variety TR39477, TTD-cod: coding transcripts from variety TTD-22)
- Supplementary Figure 4.** *Association between GC% content and length of lncRNAs from each T. turgidum variety.*
- Supplementary Table 1.** *TR39477 and TTD-22 specific transcripts expressed under drought stress.* (A) and (B) Drought specific transcripts of TR39477 and TTD-22 were blasted and the transcripts which do not exhibit any similarity to each other were listed in below. (C) KEGG maps for TR39477 specific transcripts which are expressed in response to drought stress are listed.
- Supplementary Table 2.** *miRNAs which targets the lncRNAs from variety Kiziltan (A) TR39477(B) and TTD-22(C).*
- Supplementary Table 3.** *Number of transcripts across the three T. turgidum varieties.* Number of transcripts listed either without filtering or with a filtering of >0.5 FPKM.
- Supplementary Table 4.** *QRT-PCR primers for validation of mRNA and lncRNA transcripts from Kiziltan.*
- Supplementary Table 5.** *Stem-loop RT-PCR primers for miR1436-1 and miR1436-4 from Kiziltan.*
- Supplementary File 1** (xlsx). *The annotation of transcripts from each sample.* First sheet contains the information for transcripts from variety Kiziltan. Second sheet contains the information for transcripts from variety TR39477. Third sheet contains the information for transcripts from variety TTD-22.
- Supplementary File 2** (xlsx). *miRNA-lncRNA target pairs utilized in miRNA-lncRNA-mRNA networks.* First sheet contains the information for miRNA-lncRNA pairs from variety Kiziltan. Second sheet contains the information for miRNA-lncRNA pairs from variety TR39477. Third sheet contains the information for miRNA-lncRNA pairs from variety TTD-22.

## Supplementary Figures

**Supplementary Figure 1.** *The distribution of percent change of the number of transcripts over a set of FPKM cutoffs. Plot of percent change over 0 to 2 FPKM cutoffs (A). Closer look at the graph between the cutoffs of 0 to 1 (B).*

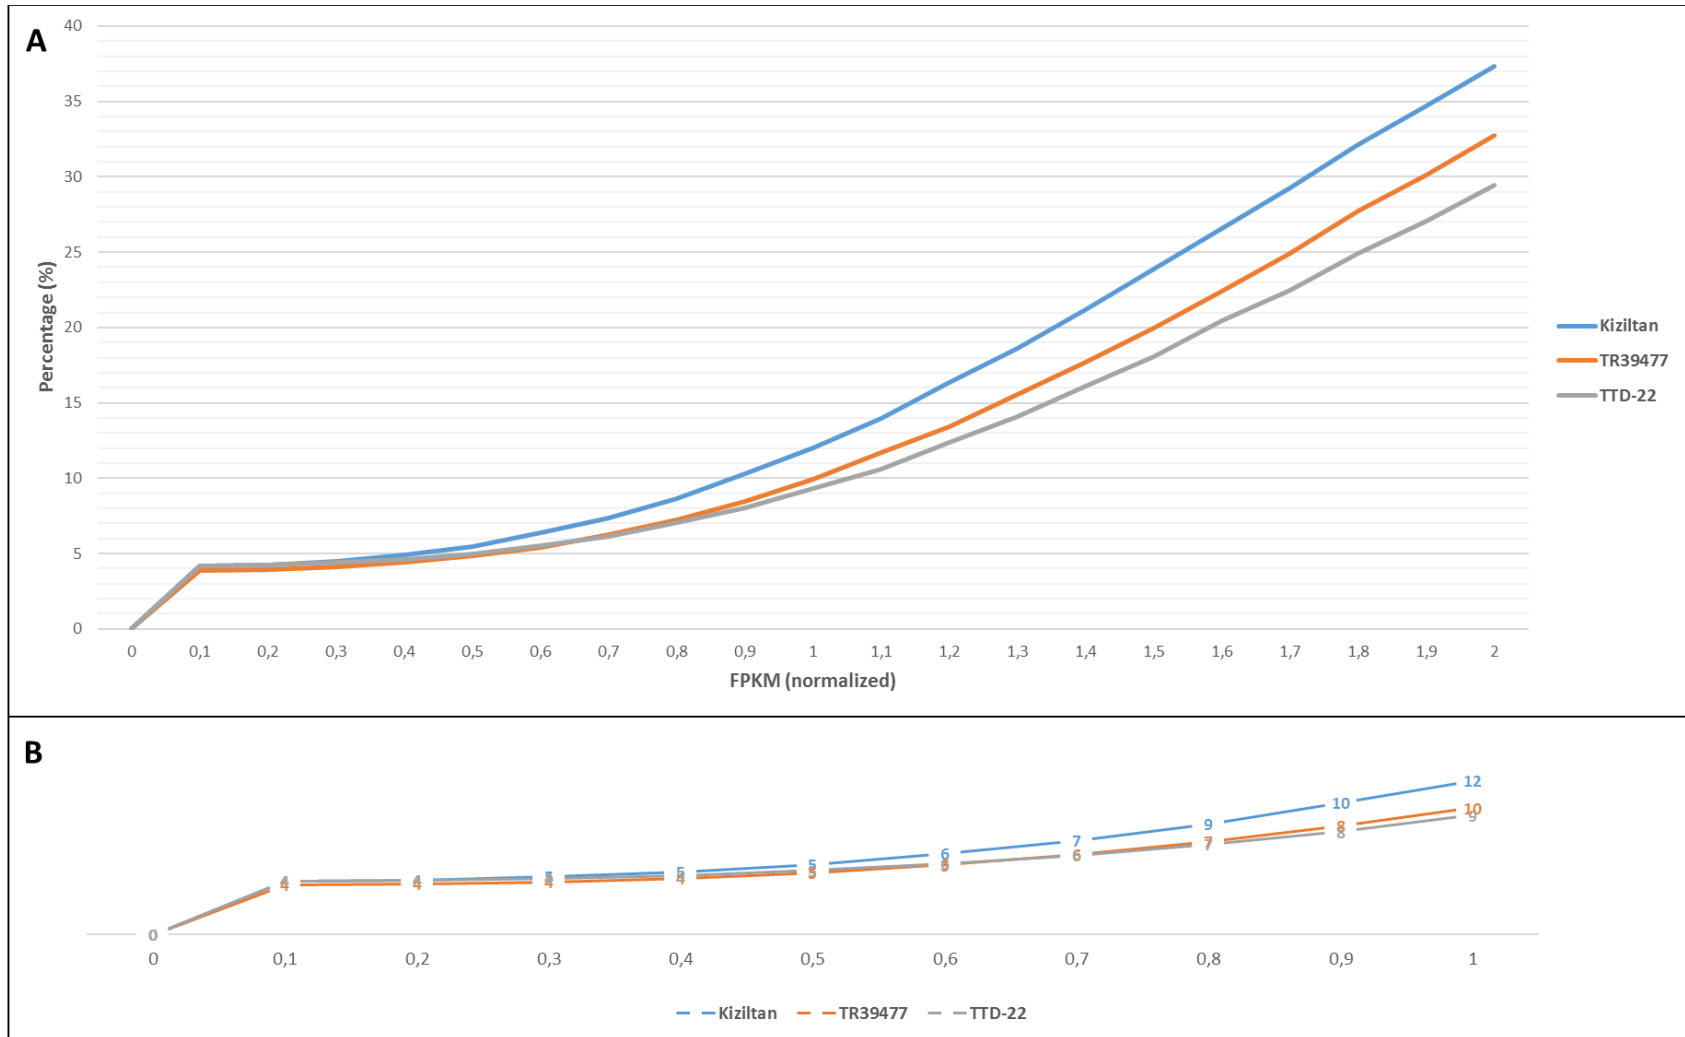

**Supplementary Figure 2.** Homology pattern between *T. turgidum* proteins and other plants. **(A)** The pie chart shows the distribution of top-ten plants which showed the highest homology to *T. turgidum* proteins. **(B)** Pie chart shows the distribution of e-values for different blast hits.

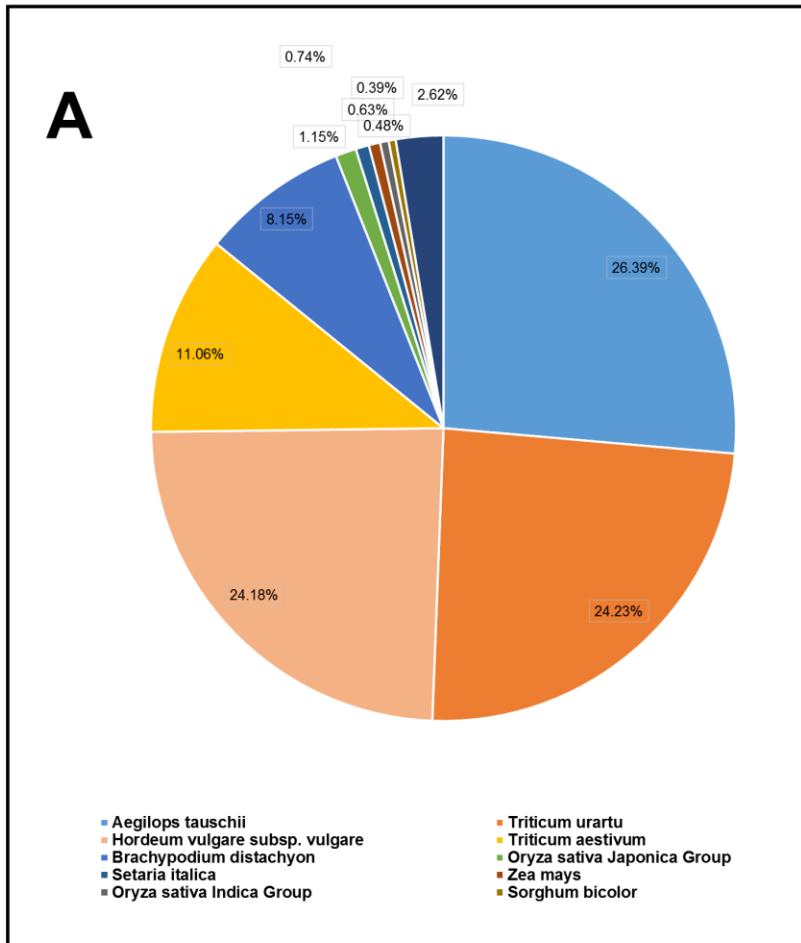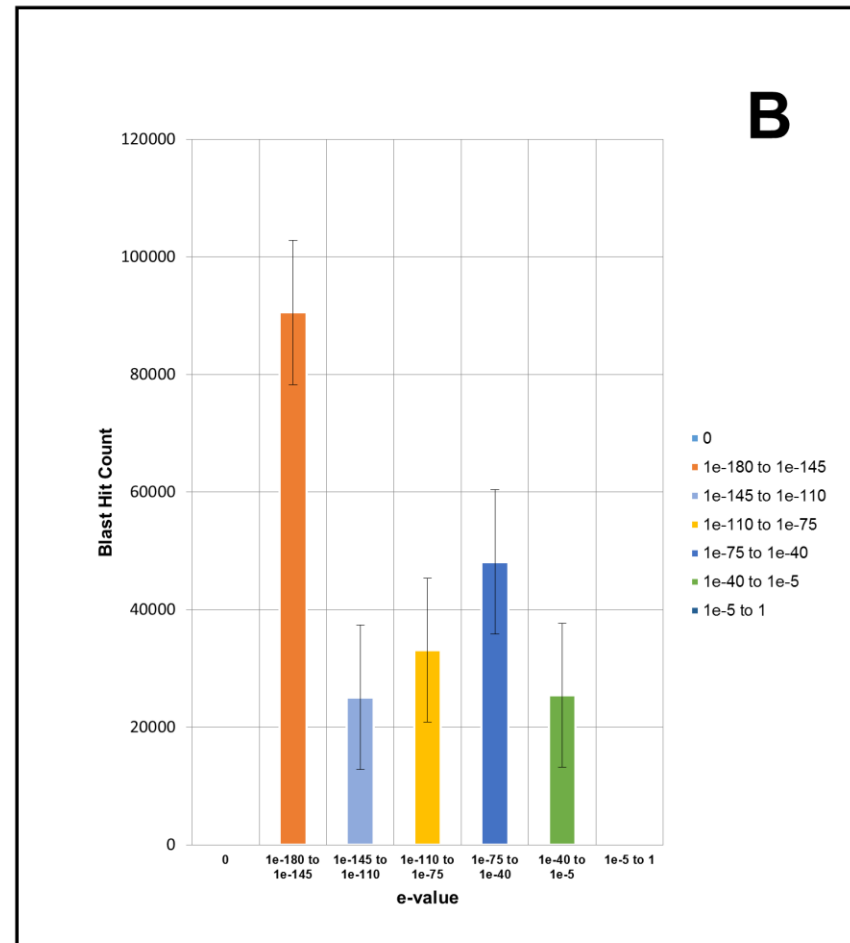

**Supplementary Figure 3.** Length distribution of lncRNAs and coding transcripts from each *T. turgidum* variety. (Explanation for graph legend: Kiz-lnc: lncRNAs from variety Kiziltan, TR-lnc: lncRNAs from variety TR39477, TTD-lnc: lncRNAs from variety TTD-22, Kiz-cod: coding transcripts from variety Kiziltan, TR-cod: coding transcripts from variety TR39477, TTD-cod: coding transcripts from variety TTD-22)

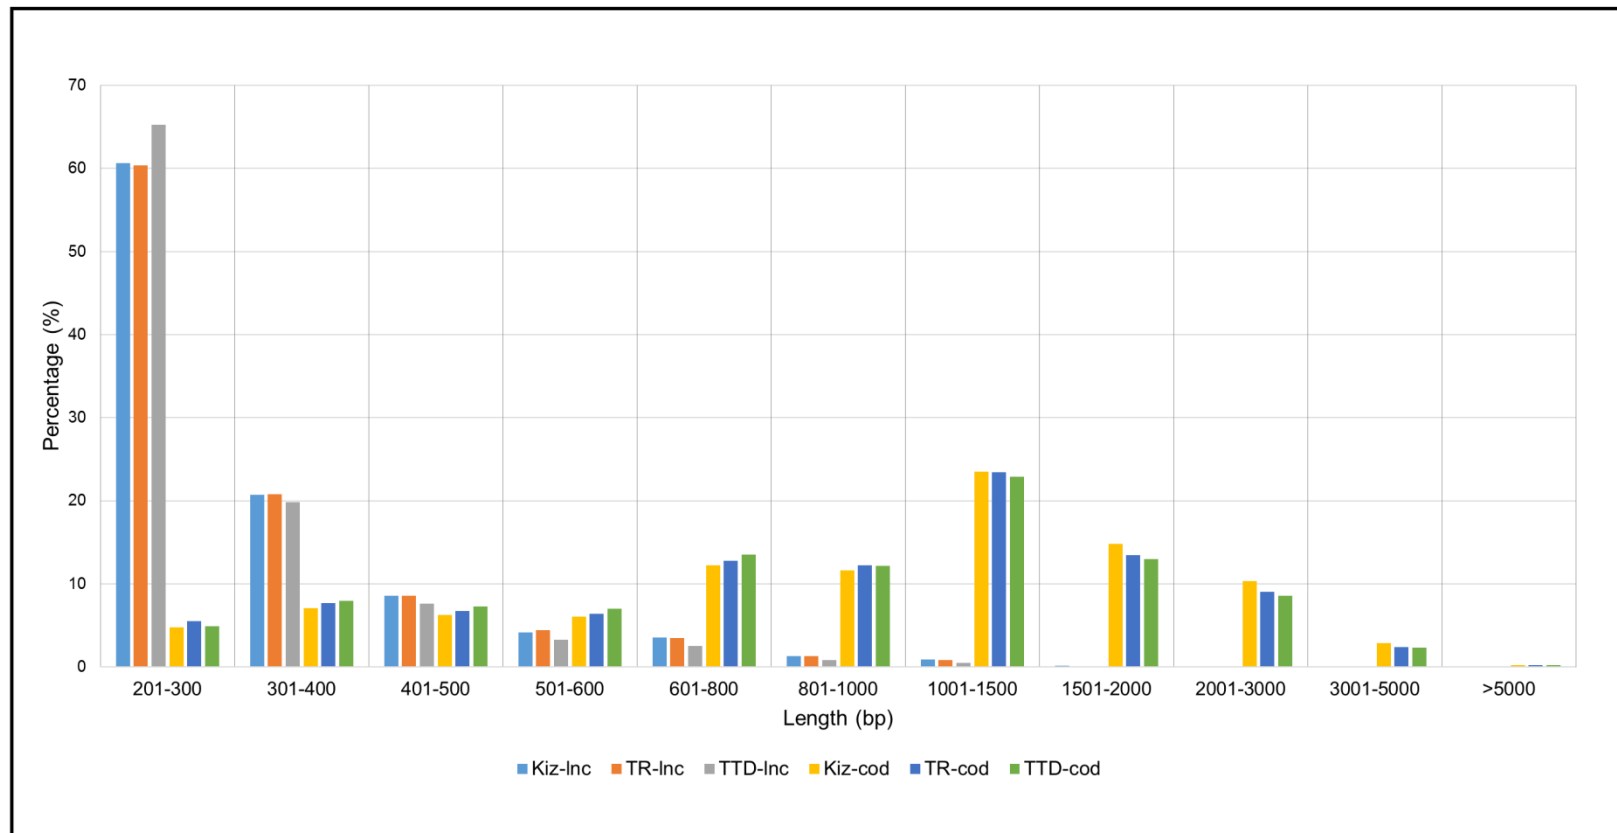

**Supplementary Figure 4.** Association between GC% content and length of lncRNAs from each *T. turgidum* variety.

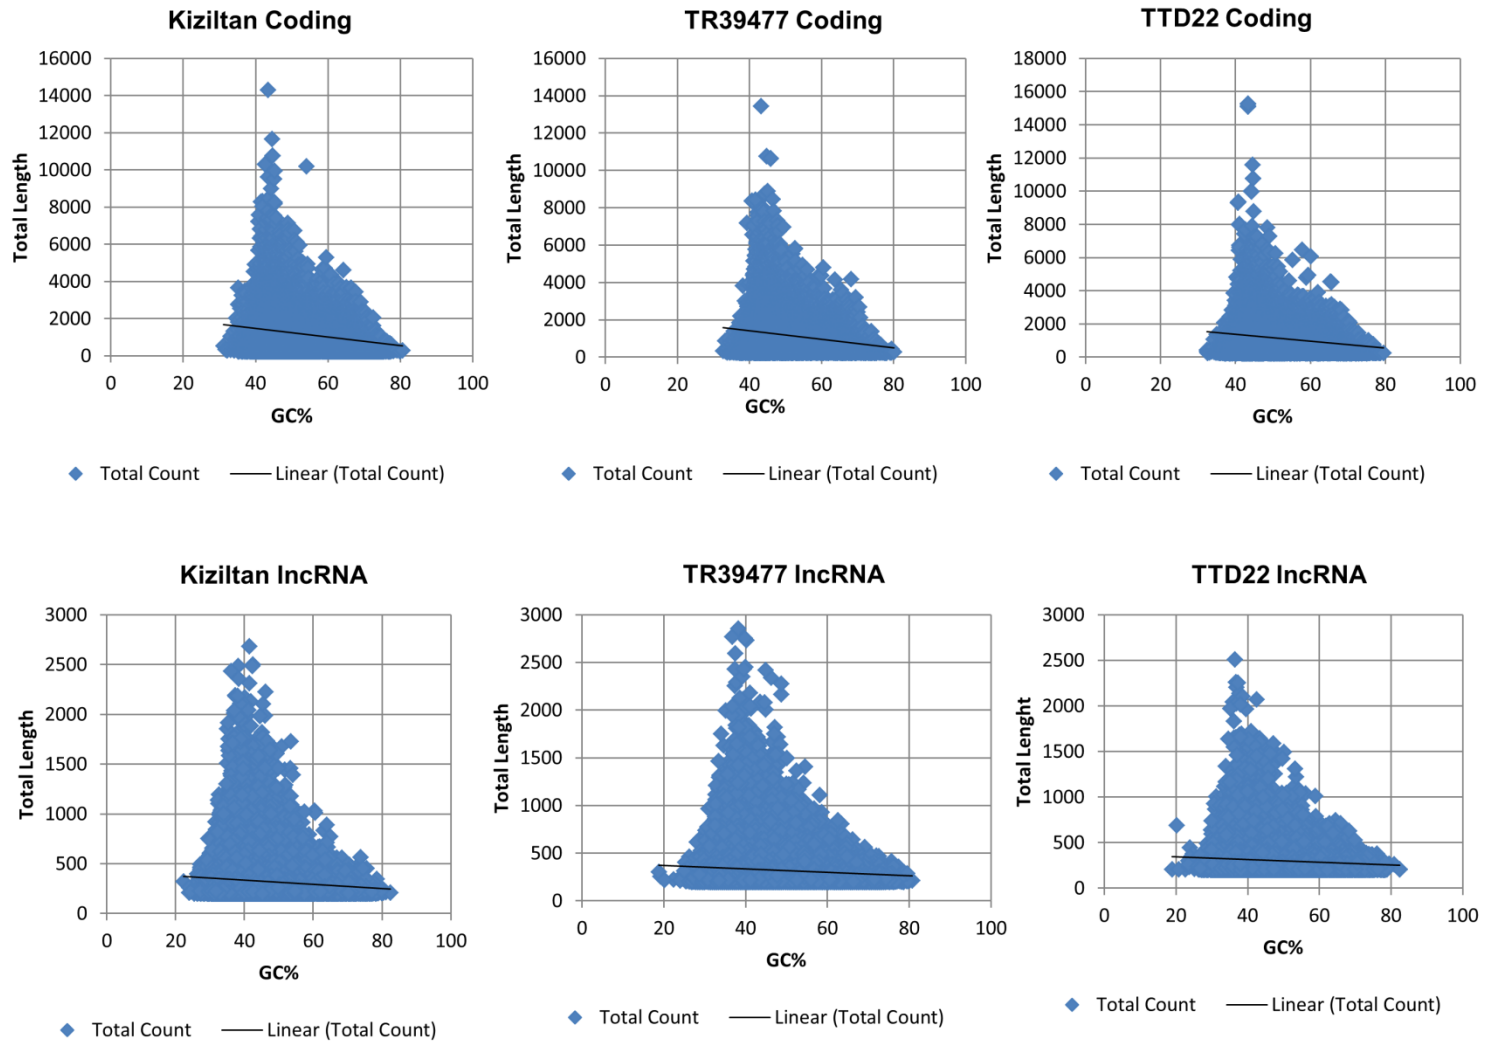

## Supplementary Tables

**Supplementary Table 1.** *TR39477 and TTD-22 specific transcripts expressed under drought stress.* (A) and (B) Drought specific transcripts of TR39477 and TTD-22 were blasted and the transcripts which do not exhibit any similarity to each other were listed in below. (C) KEGG maps for TR39477 specific transcripts which are expressed in response to drought stress are listed.

### (A) Transcript IDs for drought specific coding transcripts of TR39477 which do not exhibit any similarity to TTD-22 transcripts

TR\_DS\_c100335\_g1\_i1,TR\_DS\_c100721\_g1\_i1,TR\_DS\_c10663\_g1\_i1,TR\_DS\_c111097\_g1\_i1,TR\_DS\_c112175\_g1\_i1,TR\_DS\_c115342\_g1\_i1,TR\_DS\_c118586\_g1\_i1,TR\_DS\_c119351\_g1\_i1,TR\_DS\_c121962\_g1\_i1,TR\_DS\_c122655\_g1\_i1,TR\_DS\_c124109\_g1\_i1,TR\_DS\_c133829\_g1\_i1,TR\_DS\_c139001\_g1\_i1,TR\_DS\_c13972\_g1\_i1,TR\_DS\_c18086\_g1\_i1,TR\_DS\_c23531\_g1\_i1,TR\_DS\_c32200\_g1\_i2,TR\_DS\_c5817\_g1\_i1,TR\_DS\_c59003\_g1\_i2,TR\_DS\_c68118\_g1\_i1,TR\_DS\_c7239\_g1\_i1,TR\_DS\_c76507\_g1\_i1,TR\_DS\_c77362\_g1\_i1,TR\_DS\_c77721\_g1\_i1,TR\_DS\_c79749\_g1\_i1,TR\_DS\_c81581\_g1\_i1,TR\_DS\_c83024\_g1\_i1,TR\_DS\_c83819\_g1\_i1,TR\_DS\_c84249\_g1\_i1,TR\_DS\_c86337\_g1\_i1,TR\_DS\_c87167\_g1\_i1,TR\_DS\_c87458\_g1\_i1,TR\_DS\_c87491\_g1\_i1,TR\_DS\_c93476\_g1\_i1,TR\_DS\_c94439\_g1\_i1,TR\_DS\_c9969\_g1\_i1

### (B) Transcript IDs for drought specific coding transcripts of TTD-22 which do not exhibit any similarity to TR39477 transcripts

TD\_DS\_c115797\_g1\_i1, TTD\_DS\_c53857\_g1\_i1, TTD\_DS\_c54409\_g1\_i4, TTD\_DS\_c86980\_g1\_i1

### (C) KEGG maps for TR39477 specific transcripts (expressed only under drought stress) and their description

|          |                                                 |
|----------|-------------------------------------------------|
| map00190 | oxidative phosphorylation                       |
| map00480 | Glutathione metabolism                          |
| map00230 | Purine metabolism                               |
| map00600 | Sphingolipid metabolism                         |
| map00240 | Pyrimidine metabolism                           |
| map00730 | Thiamine metabolism                             |
| map00604 | Glycosphingolipid biosynthesis - ganglio series |
| map00531 | Glycosaminoglycan degradation                   |
| map00511 | Other glycan degradation                        |
| map00052 | Galactose metabolism                            |

**Supplementary Table 2.** *miRNAs which targets the lncRNAs from variety Kiziltan (A) TR39477(B) and TTD-22(C).*

| <b>(A) miRNAs and their lncRNAs targets from Kiziltan variety</b> |                        |                     |                   |                                |                                    |
|-------------------------------------------------------------------|------------------------|---------------------|-------------------|--------------------------------|------------------------------------|
| <b>miRNA ID</b>                                                   | <b>lncRNA ID</b>       | <b>Target Start</b> | <b>Target End</b> | <b>Aligned Target Fragment</b> | <b>Target Inhibition Mode</b>      |
| <i>miR1436</i>                                                    | Kiz_both_c123855_g1_i1 | 150                 | 169               | CUUCUCCAUCCCAUGAUUG            | Cleavage                           |
| <i>miR1136</i>                                                    | Kiz_both_c38021_g1_i1  | 3                   | 26                | UAGAUACAUCCAUUUCUGCGA<br>UGA   | Cleavage or Translation repression |
| <i>miR854</i>                                                     | Kiz_both_c50149_g1_i1  | 577                 | 597               | CUUCUUCUCCUCUUCUUCUU           | Cleavage                           |
| <i>miR1135</i>                                                    | Kiz_CK_c50944_g2_i1    | 496                 | 519               | UCCUUCCAAAUACUUGUCG<br>UGG     | Cleavage                           |
| <i>miR1439</i>                                                    | Kiz_CK_c50944_g2_i1    | 488                 | 507               | CUACUCCUCCUUUCCAAAU            | Translation repression             |
| <i>miR1133</i>                                                    | Kiz_DS_c68120_g9_i2    | 120                 | 141               | UUAGGAACGGAGGGAGUAGG<br>UC     | Cleavage                           |
| <i>miR1436</i>                                                    | Kiz_both_c70772_g2_i1  | 132                 | 151               | ACUCCCUCCGUUCC-UAAAUA          | Cleavage                           |
| <i>miR1439</i>                                                    | Kiz_both_c70772_g2_i1  | 130                 | 149               | CUACUCCCUCCGUUCCUAAA           | Cleavage                           |
| <i>miR1439</i>                                                    | Kiz_DS_c79679_g1_i1    | 201                 | 221               | [A]CUACUCCCUCCGUUCCGAA<br>U    | Cleavage                           |
| <i>miR1436</i>                                                    | Kiz_DS_c90557_g1_i1    | 361                 | 381               | ACUCCCUCCGUUCCUUUAUGU          | Cleavage                           |
| <i>miR1436</i>                                                    | Kiz_both_c96195_g1_i1  | 262                 | 282               | ACUCCCUUGUUC CAGAAUAA          | Cleavage                           |
| <i>miR1439</i>                                                    | Kiz_both_c96195_g1_i1  | 259                 | 279               | UUUACUCCCUUGUUC CAGAA          | Cleavage                           |
| <i>miR437</i>                                                     |                        | 304                 | 324               | AACUCAUCUUGUUUAAGUUU           | Translation repression             |

**(B) miRNAs and their lncRNAs targets from TR39477 variety**

| <b>miRNA ID</b> | <b>lncRNA ID</b>      | <b>Target Start</b> | <b>Target End</b> | <b>Aligned Target Fragment</b> | <b>Target Inhibition Mode</b> |
|-----------------|-----------------------|---------------------|-------------------|--------------------------------|-------------------------------|
| <i>miR1137</i>  | TR_both_c118135_g1_i1 | 189                 | 209               | AGUGUCUCAAAUUUUGUACUA          | Translation repression        |
| <i>miR1436</i>  | TR_both_c118135_g1_i1 | 169                 | 189               | ACUACCUCCGUCCUAAAAUAA          | Cleavage                      |
| <i>miR1439</i>  | TR_both_c118135_g1_i1 | 140                 | 160               | GAUACUCCCUCCGUCUAAAA           | Cleavage                      |
| <i>miR1439</i>  | TR_both_c118135_g1_i1 | 167                 | 186               | UUACUACCUCCGUCCUAAAA           | Cleavage                      |
| <i>miR1436</i>  | TR_CK_c12385_g1_i1    | 275                 | 295               | ACUCCCUUUGUCUAAAAUGA           | Cleavage                      |
| <i>miR1120</i>  | TR_DS_c34320_g1_i1    | 121                 | 143               | UCCGUUUCAUAAUAUAACAGC<br>GU    | Cleavage                      |
| <i>miR1436</i>  | TR_DS_c34320_g1_i1    | 115                 | 135               | [A]CUUCAUCCGUUUCAUAAUA<br>U    | Cleavage                      |
| <i>miR1439</i>  | TR_DS_c34320_g1_i1    | 113                 | 132               | GUACUUCAUCCGUUUCAUAA           | Cleavage                      |
| <i>miR1128</i>  | TR_DS_c44260_g1_i1    | 328                 | 348               | UUAGGGACGGAGGGAGUAGU<br>U      | Cleavage                      |
| <i>miR1128</i>  | TR_both_c56781_g1_i5  | 1266                | 1285              | UUUAUAUGGAGGGAGUAUUU           | Cleavage                      |
| <i>miR1133</i>  | TR_both_c56781_g1_i1  | 1266                | 1286              | UUUAUAUGGAGGGAGUAUUU<br>A      | Cleavage                      |
| <i>miR1436</i>  | TR_DS_c58890_g4_i2    | 448                 | 467               | CUCCCUCCUCUUUAAUAU             | Cleavage                      |
| <i>miR1139</i>  | TR_both_c60784_g1_i5  | 461                 | 480               | GUUACUAG-CUAAGUUACUCC          | Cleavage                      |
| <i>miR1128</i>  | TR_CK_c61658_g1_i1    | 4                   | 24                | UUCGGAACGGAGGGAGUAGU<br>A      | Cleavage                      |
| <i>miR1436</i>  | TR_both_c63034_g2_i23 | 24                  | 44                | ACUUCCUCGGUCCAAAAUUC           | Cleavage                      |



|                |                       |     |     |                               |                                    |
|----------------|-----------------------|-----|-----|-------------------------------|------------------------------------|
| <i>miR1439</i> | TR_both_c63034_g2_i23 | 22  | 41  | CUACUCCUCGGUUCCAAAA           | Translation repression             |
| <i>miR1122</i> | TR_DS_c63034_g2_i3    | 744 | 763 | UCUAAAUGCGGAUGUAUCUA          | Cleavage                           |
| <i>miR1436</i> | TR_DS_c63034_g2_i3    | 709 | 729 | ACUCCCUCCGUCUCAAAAUUC         | Cleavage or Translation repression |
| <i>miR1439</i> | TR_DS_c63034_g2_i3    | 706 | 726 | [A]GUACUCCCUCCGUCUCAA<br>A    | Cleavage                           |
| <i>miR1118</i> | TR_DS_c63271_g2_i1    | 831 | 853 | UCCCUCCAUUCCAAAUAUAG<br>CG    | Cleavage                           |
| <i>miR1436</i> | TR_DS_c63271_g2_i1    | 829 | 849 | [A]CUCCCUCCAUUCCAAAUA<br>U    | Cleavage                           |
| <i>miR1439</i> | TR_DS_c63271_g2_i1    | 826 | 846 | [C]UUACUCCCUCCAUUCCAA<br>A    | Cleavage or Translation repression |
| <i>miR1136</i> | TR_DS_c63631_g1_i7    | 662 | 681 | AACAUUCAUAUGUGUGACAU          | Cleavage                           |
| <i>miR1436</i> | TR_DS_c65082_g1_i1    | 244 | 264 | ACUCCCUCCGUUCCUUUAU           | Cleavage                           |
| <i>miR1439</i> | TR_CK_c67474_g1_i1    | 401 | 421 | ACUGCUCUCCUCCGUUCUAAA         | Cleavage                           |
| <i>miR1130</i> | TR_both_c94590_g1_i1  | 210 | 232 | [AU]UCUUAUAUUAUGGGACGG<br>AGG | Cleavage or Translation repression |
| <i>miR1436</i> | TR_both_c94590_g1_i1  | 188 | 207 | ACUCCUUCUGUCCC-UAAUGC         | Cleavage                           |

**(C) miRNAs and their lncRNAs targets from TTD-22 variety**

| <b>miRNA ID</b> | <b>lncRNA ID</b>    | <b>Target Start</b> | <b>Target End</b> | <b>Aligned Target Fragment</b> | <b>Target Inhibition Mode</b> |
|-----------------|---------------------|---------------------|-------------------|--------------------------------|-------------------------------|
| <i>miR1436</i>  | TTD_DS_c58970_g2_i3 | 225                 | 245               | [A]CUCCCUCCGUUCCAAAUA<br>G     | Cleavage                      |
| <i>miR1439</i>  | TTD_DS_c58970_g2_i3 | 223                 | 242               | [G]UACUCCCUCCGUUCCAAA          | Cleavage                      |
| <i>miR1128</i>  | TTD_DS_c60722_g1    | 4                   | 24                | UUUGGGACGGAGGGAGUACU           | Cleavage                      |

|                |                         |      |      |                             |                                       |
|----------------|-------------------------|------|------|-----------------------------|---------------------------------------|
|                |                         |      |      | A                           |                                       |
| <i>miR1120</i> | TTD_CK_c62154_g1<br>_i2 | 682  | 705  | CUCCGUCCCAUAAUUAACAG<br>CGU | Cleavage                              |
| <i>miR1436</i> | TTD_CK_c62154_g1<br>_i2 | 677  | 697  | [A]UUCCCUCCGUCCCAUAAUA<br>U | Cleavage or Translation<br>repression |
| <i>miR1436</i> | TTD_DS_c64640_g2<br>_i1 | 2490 | 2510 | ACUCCCUCCGUCCCAAAUUC        | Cleavage                              |
| <i>miR1439</i> | TTD_DS_c64640_g2<br>_i1 | 2487 | 2507 | [A]CUACUCCCUCCGUCCCAA<br>A  | Cleavage                              |

**Supplementary Table 3.** *Number of transcripts across the three T. turgidum varieties.* Number of transcripts listed either without filtering or with a filtering of >0.5 FPKM.

|                    | The number of      | Kiziltan | TR39477 | TTD-22 |
|--------------------|--------------------|----------|---------|--------|
| Without filtering  | All transcripts    | 243670   | 211709  | 203230 |
|                    | Coding transcripts | 84288    | 75996   | 78456  |
|                    | lncRNA transcripts | 63773    | 61823   | 43932  |
| Actively-expressed | All transcripts    | 230359   | 201499  | 193087 |
|                    | Coding transcripts | 81168    | 73465   | 75861  |
|                    | lncRNA transcripts | 59110    | 57944   | 40858  |

**Supplementary Table 4.** *QRT-PCR primers for validation of mRNA and lncRNA transcripts from Kiziltan.*

| <b>lncRNA ID</b>             | <b>lncRNA Length</b> | <b>Sequence</b>             | <b>Primer Start Site in Target</b> | <b>Primer End Site in Target</b> | <b>Length</b> | <b>GC %</b> | <b>Amplicon Length</b> |
|------------------------------|----------------------|-----------------------------|------------------------------------|----------------------------------|---------------|-------------|------------------------|
| lncRNA_c118446_g1_i1-Forward | 341                  | TCTCTGGCCTAAGCAACT<br>TTAC  | 100                                | 122                              | 22            | 45.5        | 127                    |
| lncRNA_c118446_g1_i1-Reverse | 341                  | GCTTTCCCAAAGCCCTGA<br>TA    | 207                                | 227                              | 20            | 50          | 127                    |
| lncRNA_c47700_g1_i1-Forward  | 472                  | GGAACAGCGACAGTACA<br>GTAAG  | 188                                | 210                              | 22            | 50          | 139                    |
| lncRNA_c47700_g1_i1-Reverse  | 472                  | TGTGTGACTGTGAGAGAG<br>AGATA | 304                                | 327                              | 23            | 43.5        | 139                    |
| mRNA_c17408_g1_i1-Forward    | 879                  | CTCAGACCTTCGATCAAA<br>GACG  | 110                                | 132                              | 22            | 50          | 97                     |
| mRNA_c17408_g1_i1-Reverse    | 879                  | TCCATGTACGTCCACCTA<br>GAG   | 186                                | 207                              | 21            | 52.4        | 97                     |
| mRNA_c55246_g1_i1-Forward    | 1734                 | CGACGTGTAAGCATCAGA<br>GAA   | 154                                | 175                              | 21            | 47.6        | 105                    |
| mRNA_c55246_g1_i1-Reverse    | 1734                 | AGCCTATGCACTTCCCTA<br>AATC  | 237                                | 259                              | 22            | 45.5        | 105                    |
| lncRNA_c70772_g2_i1-Forward  | 208                  | GCCTCCCTGTGCAAACAT<br>A     | 81                                 | 100                              | 19            | 52.6        | 102                    |
| lncRNA_c70772_g2_i1-Reverse  | 208                  | AGTCACTTGTTGAAATGC<br>CTAGA | 160                                | 182                              | 23            | 39.1        | 102                    |
| mRNA_c69036_g1_i1-Forward    | 756                  | ATTGGCGCTGACGAGAAA          | 251                                | 269                              | 18            | 50          | 98                     |
| mRNA_c69036_g1_i1-Reverse    | 756                  | CTACCTGCACAGTCCATCT<br>TC   | 328                                | 349                              | 21            | 52.6        | 98                     |
| lncRNA_c90557_g1_i1-Forward  | 385                  | CTGCTCTGCTCTGTACTGT<br>ATC  | 104                                | 126                              | 22            | 62          | 88                     |
| lncRNA_c90557_g1_i1-Reverse  | 385                  | GATCTCCTCTACAGCCAC<br>AAG   | 171                                | 192                              | 21            | 61          | 88                     |
| mRNA_c9653_g1_i2-Forward     | 2483                 | ATCCTCTCCTTCCTGGTCA<br>A    | 872                                | 892                              | 20            | 50          | 92                     |
| mRNA_c9653_g1_i2-Reverse     | 2483                 | CCTCGACTGCGTGAAATA<br>GAA   | 943                                | 964                              | 21            | 47.6        | 92                     |

**Supplementary Table 5.** *Stem-loop RT-PCR primers for miR1436-1 and miR1436-4 from Kiziltan.*

| <b>Primer Name</b>                   | <b>Sequence</b>                                     |
|--------------------------------------|-----------------------------------------------------|
| Universal Reverse Primer for qRT-PCR | GTGCAGGGTCCGAGGT                                    |
| miR1439-3_Stemloop                   | GTTGGCTCTGGTGCAGGGTCCGAGGTATTCGCACCAGAGCCAACAATACT  |
| miR1436-1_Stemloop                   | GTTGGCTCTGGTGCAGGGTCCGAGGTATTCGCACCAGAGCCAACACTCCC  |
| miR1436-4_Stemloop                   | GTTGGCTCTGGTGCAGGGTCCGAGGTATTCGCACCAGAGCCAACACTCCC  |
| miR854_Stemloop                      | GTTGGCTCTGGTGCAGGGTCCGAGGTATTCGCACCAGAGCCAACCTCCTC  |
| miR1133-1_Stemloop                   | GTTGGCTCTGGTGCAGGGTCCGAGGTATTCGCACCAGAGCCAACCTTTGGG |
